# Supplementary material for: High Expression of Cancer-IgG Is Associated With Poor Prognosis and Radioresistance via PI3K/AKT/DNA-PKcs Pathway Regulation in Lung Adenocarcinoma
Source: Front Oncol. 2021 Jun 2;11:675397. doi: 10.3389/fonc.2021.675397 (PMC8208032; doi:10.3389/fonc.2021.675397)
Supplement: Supplementary file 1 [file Table_1.xlsx]

## Sheet: Sheet1
	H292-Scrable	H292Sicancer-IgG	PC9-Scrable	PC9Sicancer-IgG
1	16.2273	25.1704	15.3434	28.657
2	24.8765	25.0079	23.5848	25.8797
3	22.4017	19.0321	12.4021	27.7312
4	12.9906	33.556	22.5321	23.7761
5	15.2623	30.8109	13.4421	26.4765
6	17.0491	35.3993	19.0912	32.4419
7	17.1791	37.786	27.1744	27.2189
8	21.9451	31.3244	20.5247	14.6918
9	15.3297	33.1916	25.3297	30.1214
10	23.5444	22.4204	25.5322	36.2221
11	15.9287	42.3273	23.7321	37.311
12	10.5662	20.2274	22.4343	39.3019
13	20.888	34.5987	17.3721	31.6387
14	15.0233	39.6927	17.332	29.6617
15	13.6228	32.4204	15.3485	36.6679
16	18.0959	25.0846	14.9843	23.9432
17	23.1148	27.7444	25.4248	33.831
18	24.8258	24.6503	18.9786	43.521
19	17.978	25.3152	25.8998	31.4799
20	25.262	26.7249	26.6322	36.7395
21	19.2837	27.1914	19.3757	38.1312
22	12.6592	22.9501	22.9752	39.9931
23	18.9696	17.4582	28.9362	34.0009
24	25.6933	25.4032	27.5689	35.1258
25	17.5298	34.5445	15.769	26.5992
26	18.3744	36.0173	19.4234	32.2262
27	14.9508	25.9234	21.5794	37.9895
28	17.0699	25.0214	19.4757	32.4411
29	14.6304	29.434	34.3244	10.174
30	20.7332	34.7553	23.3112	31.0329
31	24.03	24.3507	27.3943	40.3027
32	16.4373	28.4374	16.1176	19.4477
33	14.1798	21.886	14.1809	35.5096
34	14.1348	29.4874	21.5982	32.8703
35	19.1267	27.1151	17.3471	25.0587
36	17.1592	26.7259	23.9453	26.9313
37	24.8982	34.7277	23.6954	36.1984
38	23.9498	29.6965	23.0385	31.8702
39	22.2904	23.1357	25.9277	28.1891
40	10.6365	35.559	25.7994	27.56
41	16.3332	33.9608	18.3292	32.6139
42	19.366	32.3847	24.5766	34.9394
43	18.985	21.4857	14.8966	37.2574
44	16.007	20.155	13.3475	35.6292
45	11.9576	21.6273	13.5086	25.8388
46	15.9088	37.3275	16.3054	25.6155
47	14.5399	29.9922	16.9372	36.5955
48	18.985	23.4132	18.4932	23.353
49	10.5193	32.9073	13.4576	33.63
50	13.3339	29.0431	13.6987	23.2909
